# Supplementary material for: Effects of drip tape modes on soil hydrothermal conditions and cotton yield (Gossypium hirsutum L.) under machine-harvest patterns
Source: PeerJ. 2021 Aug 23;9:e12004. doi: 10.7717/peerj.12004 (PMC8388559; doi:10.7717/peerj.12004)
Supplement: Supplemental Information 1 [file peerj-09-12004-s001.xlsx]

## Sheet: Soil water storage and ECe
Soil depth	Soil water storage		Soil water storage		Soil water storage					Soil depth	ECe		ECe		ECe
cm	%		%		%					cm	ds/m		ds/m		ds/m
	T1		T2		T3						T1		T2		T3
10	19.15	0.51	17.98	0.52	16.24	0.31				20	2.96	0.072	2.88	0.1	3.36	0.47
20	20.04	0.62	18.86	0.45	18.67	0.36				40	2.74	0.148	2.65	0.13	3.02	0.13
30	19.03	0.41	18.46	0.31	18.11	0.42				60	2.44	0.448	2.21	0.57	2.51	0.38
40	20.12	0.6	19.25	0.28	17.98	0.41				80	3.12	0.232	2.91	0.13	2.72	0.17
50	18.86	0.5	20.12	0.43	18.1	0.48		2017-45		100	3.18	0.292	3.25	0.47	2.84	0.05
60	19.05	0.66	18.86	0.26	18.02	0.32
70	18.85	0.61	18.84	0.23	18.17	0.43
80	18.84	0.62	18.76	0.19	18.69	0.52
90	18.76	0.63	18.82	0.33	18.69	0.34
100	19.52	0.45	19.48	0.24	18.26	0.24
10	11.21	0.31	12.16	0.42	12.15	0.3
20	10.64	0.42	11.93	0.35	11.89	0.29
30	11	0.35	12.14	0.28	11.02	0.32				Soil depth	ECe		ECe		ECe
40	11.03	0.41	11.72	0.25	11.68	0.31				cm	ds/m		ds/m		ds/m
50	11.85	0.28	13.25	0.23	12.28	0.28					T1		T2		T3
60	12.24	0.36	16.87	0.18	17.01	0.22		2017-90		20	2.66	0.032	2.23	0.366	2.64	0.184
70	16.29	0.31	18.24	0.23	18	0.31				40	2.42	0.208	2.08	0.516	2.36	0.464
80	16.26	0.36	18.2	0.15	18.1	0.4				60	2.23	0.398	1.98	0.616	2.14	0.684
90	17.21	0.43	18.18	0.23	18.45	0.34				80	2.69	0.062	3.25	0.654	3.16	0.336
100	18.08	0.32	18.86	0.19	19.06	0.22				100	3.14	0.512	3.44	0.844	3.82	0.996
10	13.47	0.42	13.44	0.44	13.4	0.52
20	14.02	0.52	15.34	0.38	13.99	0.49
30	13.34	0.46	15.68	0.31	13.35	0.61				Soil depth	ECe		ECe		ECe
40	12.96	0.51	15.71	0.33	14.34	0.41				cm	ds/m		ds/m		ds/m
50	13.48	0.32	15.75	0.28	14.33	0.48					T1		T2		T3
60	13.25	0.46	15.42	0.21	14.51	0.42		2017-135		20	2.48	0.06	1.65	0.354	2.02	0.196
70	14.23	0.41	17.8	0.32	16.44	0.51				40	2.31	0.11	1.2	0.604	1.84	0.376
80	15.68	0.46	18.98	0.25	15.68	0.4				60	2.25	0.17	1.24	0.564	1.88	0.336
90	16.84	0.53	18.42	0.24	15.39	0.44				80	2.33	0.09	2.19	0.186	2.36	0.144
100	17.23	0.42	19.28	0.21	15.84	0.42				100	2.73	0.31	3.74	0.936	2.98	0.764
10	10.29	0.5	11.45	0.52	9.85	0.32
20	10.42	0.56	11.31	0.45	9.61	0.31
30	10.84	0.41	11.23	0.41	9.5	0.4				Soil depth	ECe		ECe		ECe
40	11.15	0.52	11.02	0.38	10.42	0.39				cm	ds/m		ds/m		ds/m
50	11.62	0.41	11	0.45	10.86	0.41					T1		T2		T3
60	11.12	0.36	11.01	0.36	10.28	0.34		2017-180		20	3.24	0.394	2.84	0.456	3.62	0.476
70	12.06	0.51	12.64	0.24	11.24	0.43				40	3.13	0.284	2.29	0.094	2.89	0.146
80	12.24	0.42	12.21	0.21	11.36	0.52				60	3.21	0.364	2.03	0.354	2.62	0.124
90	11.56	0.53	11.88	0.32	11.52	0.36				80	2.51	0.336	2.35	0.034	2.22	0.524
100	10.99	0.46	11.69	0.26	12.46	0.25				100	2.14	0.406	2.41	0.026	2.37	0.374
10	10.18	0.49	12.48	0.32	11.27	0.3
20	11.98	0.51	13.69	0.35	11.6	0.32
30	12.61	0.38	13.84	0.11	12.17	0.39				Soil depth	ECe		ECe		ECe
40	13.32	0.52	14.62	0.28	13.22	0.42				cm	ds/m		ds/m		ds/m
50	14.6	0.45	15.52	0.23	14.17	0.36					T1		T2		T3
60	15.72	0.61	14.78	0.18	14.52	0.41		2018-45		20	2.75	0.43	2.98	0.736	3.24	0.428
70	15.35	0.52	15.64	0.2	14.43	0.36				40	2.63	0.31	2.46	0.216	3.12	0.308
80	14.94	0.39	14.89	0.15	14.19	0.48				60	1.86	0.46	2.12	0.124	2.84	0.028
90	14.28	0.23	14.68	0.19	14.75	0.31				80	1.84	0.48	1.84	0.404	2.17	0.642
100	14.85	0.36	14.76	0.21	14.55	0.25				100	2.52	0.2	1.82	0.424	2.69	0.122
10	12.91	0.31	16.54	0.12	16.1	0.3
20	13.78	0.42	16.69	0.18	16.12	0.29
30	14.4	0.35	16.35	0.14	15.97	0.32				Soil depth	ECe		ECe		ECe
40	15.3	0.41	16.54	0.2	16.04	0.31				cm	ds/m		ds/m		ds/m
50	15.87	0.28	16.21	0.18	15.92	0.28					T1		T2		T3
60	14.96	0.36	16.34	0.18	15.67	0.22		2018-90		20	2.21	0.096	1.16	0.15	2.15	0.066
70	16.03	0.31	17.02	0.23	17	0.31				40	2.13	0.016	1.14	0.22	2.09	0.006
80	15.96	0.36	17.65	0.15	17.16	0.4				60	1.85	0.264	1.25	0.31	1.78	0.304
90	16.82	0.43	17.98	0.23	17.45	0.34				80	2.12	0.006	1.89	0.23	2.28	0.196
100	17.1	0.32	18.34	0.19	18.37	0.22				100	2.26	0.146	2.86	0.52	2.12	0.036
10	13.24	0.42	16.44	0.44	15.24	0.52
20	13.16	0.52	15.34	0.38	14.52	0.49
30	14.23	0.46	15.68	0.31	14.23	0.61				Soil depth	ECe		ECe		ECe
40	14.68	0.51	16.61	0.33	15.06	0.41				cm	ds/m		ds/m		ds/m
50	15.06	0.32	15.75	0.28	15.87	0.48					T1		T2		T3
60	15.87	0.46	15.42	0.21	15.64	0.42		2018-135		20	2.29	0.124	1.61	0.184	2.26	0.278
70	15.64	0.41	17.8	0.32	15.78	0.51				40	2.14	0.274	1.42	0.374	2.08	0.358
80	16.21	0.46	18.98	0.25	16.88	0.4				60	1.88	0.534	1.28	0.414	1.71	0.528
90	17.88	0.53	18.42	0.24	17.69	0.44				80	2.74	0.326	2.02	0.226	3.12	0.482
100	18.69	0.42	19.28	0.21	18.26	0.42				100	3.02	0.606	2.64	0.546	3.52	0.582
10	9.85	0.5	12.12	0.21	9.29	0.32
20	10.42	0.56	12	0.36	10.42	0.31
30	10.98	0.45	11.94	0.5	10.19	0.4				Soil depth	ECe		ECe		ECe
40	11.09	0.52	11.96	0.38	11.15	0.39				cm	ds/m		ds/m		ds/m
50	11.74	0.41	11.48	0.45	10.62	0.41					T1		T2		T3
60	11.85	0.36	11.64	0.36	11.12	0.34		2018-180		20	2.87	0.302	2.44	0.222	2.69	0.224
70	11.94	0.51	12.01	0.24	10.69	0.43				40	2.72	0.152	2.11	0.108	2.56	0.094
80	10.67	0.42	12.16	0.21	10.63	0.52				60	2.34	0.228	1.98	0.238	2.24	0.226
90	10.82	0.53	11.93	0.32	10.71	0.36				80	2.23	0.338	2.44	0.222	2.51	0.044
100	11.11	0.46	11.82	0.26	10.59	0.25				100	2.68	0.112	2.12	0.098	2.33	0.136

## Sheet: cotton yield and WUE
	Cotton yield			Cotton yield			WUE			WUE
	kg ha\+(-1)			kg ha\+(-1)			kg ha\+(-1)mm\+(-1)			kg ha\+(-1)mm\+(-1)
	2017			2018			2017			2018
T1	6316		ab	6227		b	9.2		b	9.1		b
T2	6701		a	6730		a	10.8		a	11		a
T3	6037		c	5991		c	8.8		b	8.96		b

## Sheet: meteorological data
Days after sowing	T-max	T-max	ET0	ET0	precipitation	precipitation
DAS	℃	℃	mm	mm	mm	mm
	T-max (2017)	T-max (2018)	ET0 (2017)	ET0 (2018)	precipitation (2017)	precipitation (2018)
2	18	20.1	4.1	3.9		0
4	22.3	22.6	5.3	5.5
6	25.4	28.7	6.6	6.8
8	26.2	28.6	6.7	6.7
10	26.8	29.6	6.8	7.5	2
12	28	26.5	6.9	6.4		4
14	26.3	27.8	6.6	6.7		3
16	25.2	25.4	5.5	5.6
18	21.7	25.6	5.2	5.8		26
20	19	24.3	4	4.9	5
22	17.8	22.1	3.8	4.5		2
24	19.6	23.5	3.9	4.7		7
26	25.6	26.7	6.6	6.8	28
28	31.2	24.9	7.1	5.7		2
30	28.8	26.9	6.9	6.6		3
32	26.2	25.8	6.5	6.5		2
34	17.9	27.3	3.9	6.7		4.8
36	22.3	25.6	5.2	5.9
38	20.3	24.7	5	5.6
40	18.7	26.8	4.9	6.2
42	16.8	26.9	4.7	6.3		6
44	18.7	25.4	4.9	5.8
46	17.9	23.2	3.6	4.9
48	18.8	22.5	3.8	4.8	12
50	20.6	20.9	5.1	4.2		12
52	21.3	18.7	5.5	3.6
54	22.5	19.8	5.9	3.9	6
56	23.7	20.5	5.4	4.1
58	19.6	22.5	4.7	4.6		2
60	26.9	23.6	5.9	4.8	8
62	28.4	25.9	5.8	5.2
64	30.3	26.8	7.1	6.4
66	26.9	25.5	5.7	6.1	2
68	28.7	24.6	5.9	5.9
70	26.9	26.8	5.7	6.3
72	29.5	28.6	6	6.9	24
74	24.6	29.8	4.5	7.1		6
76	26.9	25.6	5.7	6.5		2
78	28.7	32.1	5.9	8.2
80	30.6	30.5	7.1	8
82	31.2	29.8	7.3	7.6		1
84	28.7	26.9	5.9	7.1	4
86	29.6	30.8	6.1	8.1		5
88	28.6	29.6	5.8	6.8		6
90	26.9	31.5	5.7	8.2	6
92	27.8	27.6	5.9	6.5
94	26.4	26.4	5.6	6.3
96	29.5	29.8	5.9	7
98	23.6	24.6	4.9	5.8
100	21.9	26.5	3.4	6.2		4
102	25.6	28.9	5.6	6.4	5
104	26.7	26.3	5.7	5.8		14
106	28.9	29.6	6	6.1
108	30.2	29.5	7.2	6.9	2
110	30.6	30.6	7.1	7.1
112	29.8	28.9	6	6.8
114	28.9	27.6	5.9	6.3	4
116	28.6	26.9	5.8	5.9
118	31.6	31.6	7.3	7.9
120	26.9	28.9	6.5	7.1	6
122	29.6	29.6	6.1	7.2	2
124	24.5	27.9	4.7	6.8	3
126	28.7	31.6	6.9	7.9		10
128	27.6	30.6	6.6	6.8
130	29.6	29.6	6.8	6	5
132	26.8	30.4	5.6	7.6
136	31.2	25.7	7.2	5.2
138	33.9	30.9	7.7	6.7	6
140	21.6	27.9	4.8	5.8		12
142	28.9	28.7	6	6
144	29.7	24.6	6.3	5.3	5
146	30.6	32.6	7.2	8.2		3
148	30.4	28.9	7.1	7.1
150	31.6	30.9	7.5	7.5	12
152	28.9	28.7	6.5	6.4		6
154	26.5	29.8	6.2	6.8
156	28.7	28.8	6.4	6.9	6
158	23.6	29.9	5.2	7.2
160	25.6	31.6	5.6	8.1	5
162	24.9	30.8	4.9	8.1
164	28.7	28.7	6.3	6.9	8
166	29.6	31.6	7	8.3
168	33.6	32.7	8.5	8.6
170	32.5	29.8	8.2	7.1
172	29.6	28.7	7.8	6.6
174	24.6	30.5	5.6	7.2
178	23.6	31.2	5.1	8.1
180	25.9	28.9	5.6	6.6
