# Supplementary material for: Effects of drip tape modes on soil hydrothermal conditions and cotton yield (Gossypium hirsutum L.) under machine-harvest patterns
Source: PeerJ. 2021 Aug 23;9:e12004. doi: 10.7717/peerj.12004 (PMC8388559; doi:10.7717/peerj.12004)
Supplement: Supplemental Information 2 [file peerj-09-12004-s002.xlsx]

## Sheet: 2017 soil temperature
2017 T1（Squaring）							2017 T1（Flowering and Bolling stage）
Time	soil temperature	soil temperature	soil temperature	soil temperature	soil temperature		Time	soil temperature	soil temperature	soil temperature	soil temperature	soil temperature
	℃	℃	℃	℃	℃			℃	℃	℃	℃	℃
	5cm	10cm	15cm	20cm	25cm			5cm	10cm	15cm	20cm	25cm
08:00:00	19.8	22.5	19.9	24.9	24.2		08:00:00	23.1	24.8	25.2	24.9	23.9
10:00:00	22.6	23.5	24.8	24.8	24.2		10:00:00	23.9	24.8	25.2	24.9	23.8
12:00:00	31.6	29.2	27.4	25.2	24		12:00:00	26.2	25.4	25.6	24.8	23.8
14:00:00	40.8	34.9	30.6	27.2	24.9		14:00:00	28.4	28.9	27	26.6	24.1
16:00:00	43.6	37.9	33.8	28.2	25.6		16:00:00	30.8	30.2	28.4	26.6	24.6
18:00:00	42.9	39.8	35.2	30.4	26.7		18:00:00	31.2	30.4	28.6	26.8	24.9
20:00:00	37.8	37.6	35.2	31.4	27.8		20:00:00	29.9	30.2	29.2	28.4	25.4
2017 T2（Squaring）							2017 T2（Flowering and Bolling stage）
Time	soil temperature	soil temperature	soil temperature	soil temperature	soil temperature		Time	soil temperature	soil temperature	soil temperature	soil temperature	soil temperature
	℃	℃	℃	℃	℃			℃	℃	℃	℃	℃
	5cm	10cm	15cm	20cm	25cm			5cm	10cm	15cm	20cm	25cm
08:00:00	22.6	23.2	25.8	27.4	26.3		08:00:00	22.4	24.2	25.4	25.2	24.9
10:00:00	25.6	26.2	26.8	27.2	26.2		10:00:00	24.2	25	25.6	25.2	24.8
12:00:00	30.8	28.9	27.8	27.7	26.4		12:00:00	27.4	27.6	25.8	25.6	24.8
14:00:00	44.8	37.4	32.3	29.7	27.4		14:00:00	32.2	29.9	27.4	26.2	25
16:00:00	45.4	42.3	36.6	32.3	28.7		16:00:00	34.4	30.2	29.6	27.2	25.2
18:00:00	43.1	41.4	36.6	33.8	29.8		18:00:00	32.8	32	30.4	27.9	25.6
20:00:00	37.1	37.6	36.2	33.9	30.8		20:00:00	31.2	31.4	30.4	28.4	26.2
2017 T3（Squaring）							2017 T3（Flowering and Bolling stage）
Time	soil temperature	soil temperature	soil temperature	soil temperature	soil temperature		Time	soil temperature	soil temperature	soil temperature	soil temperature	soil temperature
	℃	℃	℃	℃	℃			℃	℃	℃	℃	℃
	5cm	10cm	15cm	20cm	25cm			5cm	10cm	15cm	20cm	25cm
08:00:00	19.4	20.7	23.6	25.1	25.1		08:00:00	22.9	23.1	24.4	25.8	24.8
10:00:00	20.2	20.7	23.6	25.2	25.1		10:00:00	23.2	22.9	24.2	25.6	24.8
12:00:00	24.6	25.2	23.9	23.8	25.1		12:00:00	26.2	24.2	24.8	25.6	24.8
14:00:00	37.2	30.6	30.4	29.6	27.4		14:00:00	30.2	26.4	25.4	26.4	25.1
16:00:00	40.6	34.9	30.4	29.2	26.2		16:00:00	33.6	30.4	28.6	27.4	25.4
18:00:00	38.9	35.6	31.9	30.2	26.8		18:00:00	32.4	30.2	28.6	28.2	26.4
20:00:00	36.2	34.4	32.4	31.2	27.8		20:00:00	30.6	29.4	28.6	28.4	26.6

## Sheet: Average soil temperature
Average soil temperature in 2018
Days after sowing	Average temperature of 5-25cm soil layer in T1 treatment	Average temperature of 5-25cm soil layer in T2 treatment	Average temperature of 5-25cm soil layer in T3 treatment	Mean atmospheric temperature
20	24.06	24.76	23.85	23.69
50	25.37	25.77	24.89	26.37
80	27.12	27.72	26.95	28.55
110	28.74	29.21	27.66	30.81
140	26.39	26.73	25.39	31.53
170	27.25	27.62	26.84	31.09
210	22.01	22.66	21.74	25.33
Average soil temperature in 2017
Days after sowing	Average temperature of 5-25cm soil layer in T1 treatment	Average temperature of 5-25cm soil layer in T2 treatment	Average temperature of 5-25cm soil layer in T3 treatment	Mean atmospheric temperature							19.8	22.5	19.9	24.9	24.2
20	26.37	26.77	25.89	24.37							22.6	23.5	24.8	24.8	24.2
50	26.42	26.72	26.95	26.55							28.6	29.2	27.4	25.2	24
80	28	28.43	27.65	30.14							28.6.8	30.9	30.6	27.2	24.9
110	26.87	27.98	25.63	29.81							29.6	31.9	28.8	28.2	25.6
140	31.08	32.65	29.3	35.72							26.9.9	29.8	28.6.2	30.4	26.7
170	26.2	27.51	25.65	33.05							25.8.8	27.6	27.2	28.4	27.8
210	21.75	22.92	21.6	26.39						26.3743	25.15	27.9143	26.45	27.0143	25.3429

## Sheet: Soil moisture content
2017 Squaring							Flowering
45DAS	Soil moisture content（%）						90DAS	Soil moisture content（%）
Soil depth	T1	Standard error	T2	Standard error	T3	Standard error	Soil depth	T1	Standard error	T2	Standard error	T3	Standard error
-10	19.15	1.25	17.98	1.34	16.24	1.01	10	11.21	0.31	12.16	0.42	12.15	0.3
-20	20.04	2.05	18.86	1.98	18.67	0.98	20	10.64	0.42	11.93	0.25	11.89	0.29
-30	19.03	1.82	18.46	1.62	18.11	1.23	30	11	0.35	12.14	0.28	11.02	0.32
-40	20.12	1.65	19.25	1.56	17.98	1.42	40	11.03	0.41	11.72	0.25	11.68	0.31
-50	18.86	2.02	20.12	1.86	18.1	1.56	50	11.85	0.28	13.25	0.23	12.28	0.28
-60	19.05	1.78	18.86	1.26	18.02	1.24	60	12.24	0.36	16.87	0.18	17.01	0.22
-70	18.85	1.23	18.84	1.12	18.17	1.59	70	16.29	0.31	18.24	0.23	18	0.31
-80	18.84	1.24	18.76	1.21	18.69	1.84	80	16.26	0.36	18.2	0.15	18.1	0.4
-90	18.76	1.26	18.82	1.35	18.69	2.01	90	17.21	0.43	18.18	0.23	18.45	0.34
-100	19.52	1.51	19.48	1.46	18.26	1.26	100	18.08	0.32	18.86	0.19	19.06	0.22
Average value	19.222		18.943		18.093			13.581		15.155		14.964
	T1 is 6.24% higher than T3		0.05							13.0117		12.6717	0.0268
Bolling							Maturity
135DAS	Soil moisture content（%）						180DAS	Soil moisture content（%）
Soil depth	T1	Standard error	T2	Standard error	T3	Standard error	Soil depth	T1	Standard error	T2	Standard error	T3	Standard error
-10	13.47	0.42	13.44	0.44	13.4	0.52	10	10.29	10.29	11.45	0.52	9.85	0.32
-20	14.02	0.52	15.34	0.38	13.99	0.49	20	10.42	10.42	11.31	0.45	9.61	0.31
-30	13.34	0.46	15.68	0.31	13.35	0.61	30	10.84	10.84	11.23	0.41	9.5	0.4
-40	12.96	0.51	15.71	0.33	14.34	0.41	40	11.15	11.15	11.02	0.38	10.42	0.39
-50	13.48	0.32	15.75	0.28	14.33	0.48	50	11.62	11.62	11	0.45	10.86	0.41
-60	13.25	0.46	15.42	0.21	14.51	0.42	60	11.12	11.12	11.01	0.36	10.28	0.34
-70	14.23	0.41	17.8	0.32	16.44	0.51	70	12.06	12.06	12.64	0.24	11.24	0.43
-80	15.68	0.46	18.98	0.25	15.68	0.4	80	12.24	12.24	12.21	0.21	11.36	0.52
-90	16.84	0.53	18.42	0.24	15.39	0.44	90	11.56	11.56	11.88	0.32	11.52	0.36
-100	17.23	0.42	19.28	0.21	15.84	0.42	100	10.99	10.99	11.69	0.26	12.46	0.25
	13.42		15.2233		13.9867
2018
2018 Squaring							Flowering
45DAS	Soil moisture content（%）						90DAS	Soil moisture content（%）
Soil depth	T1	Standard error	T2	Standard error	T3	Standard error	Soil depth	T1	Standard error	T2	Standard error	T3	Standard error
-10	10.18	0.49	12.48	0.32	11.27	0.3	10	12.91	0.31	16.54	0.12	16.1	0.3
-20	11.98	0.51	13.69	0.35	11.6	0.32	20	13.78	0.42	16.69	0.18	16.12	0.29
-30	12.61	0.38	13.84	0.11	12.17	0.39	30	14.4	0.35	16.35	0.14	15.97	0.32
-40	13.32	0.52	14.62	0.28	13.22	0.42	40	15.3	0.41	16.54	0.2	16.04	0.31
-50	14.6	0.45	15.52	0.23	14.17	0.36	50	15.87	0.28	16.21	0.18	15.92	0.28
-60	15.72	0.61	14.78	0.18	14.52	0.41	60	14.96	0.36	16.34	0.18	15.67	0.22
-70	15.35	0.52	15.64	0.2	14.43	0.36	70	16.03	0.31	17.02	0.23	17	0.31
-80	14.94	0.39	14.89	0.15	14.19	0.48	80	15.96	0.36	17.65	0.15	17.16	0.4
-90	14.28	0.23	14.68	0.19	14.75	0.31	90	16.82	0.43	17.98	0.23	17.45	0.34
-100	14.85	0.36	14.76	0.21	14.55	0.25	100	17.1	0.32	18.34	0.19	18.37	0.22
	13.783		14.49		13.487			15.313		16.966		16.58
	0.0219		0.0744							16.445		15.97	0.0297
Bolling							Maturity
135DAS	Soil moisture content（%）						180DAS	Soil moisture content（%）
Soil depth	T1	Standard error	T2	Standard error	T3	Standard error	Soil depth	T1	Standard error	T2	Standard error	T3	Standard error
-10	13.24	0.42	16.44	0.44	15.24	0.52	10	9.85	0.5	12.12	0.21	9.29	0.32
-20	13.16	0.52	15.34	0.38	14.52	0.49	20	10.42	0.56	12	0.36	10.42	0.31
-30	14.23	0.46	15.68	0.31	14.23	0.61	30	10.98	0.45	11.94	0.5	10.19	0.4
-40	14.68	0.51	16.61	0.33	15.06	0.41	40	11.09	0.52	11.96	0.38	11.15	0.39
-50	15.06	0.32	15.75	0.28	15.87	0.48	50	11.74	0.41	11.48	0.45	10.62	0.41
-60	15.87	0.46	15.42	0.21	15.64	0.42	60	11.85	0.36	11.64	0.36	11.12	0.34
-70	15.64	0.41	17.8	0.32	15.78	0.51	70	11.94	0.51	12.01	0.24	10.69	0.43
-80	16.21	0.46	18.98	0.25	16.88	0.4	80	10.67	0.42	12.16	0.21	10.63	0.52
-90	17.88	0.53	18.42	0.24	17.69	0.44	90	10.82	0.53	11.93	0.32	10.71	0.36
-100	18.69	0.42	19.28	0.21	18.26	0.42	100	11.11	0.46	11.82	0.26	10.59	0.25
	14.3733		15.8733		15.0933
					11.4
					10.99
					11.35					13.24
					11.34					13.16
					11.33					14.23
					11.51					14.68
					11.44					15.06
					11.87					15.87
					12					15.64
					14.32					14.21
										12.88
										12.69

## Sheet: Soil salt content
2017 Squaring							Flowering
45DAS	ECe（ds/m）						90DAS	ECe（ds/m）						2.75	2.32	0.43
Soil depth	T1		T2		T3		Soil depth	T1		T2		T3		2.63	2.32	0.31
20	2.96	0.072	2.88	0.1	3.36	0.47	20	2.66	0.032	2.23	0.366	2.64	0.184	1.86	2.32	-0.46
40	2.74	0.148	2.65	0.13	3.02	0.13	40	2.42	0.208	2.08	0.516	2.36	0.464	1.84	2.32	-0.48					Number	Electrical conductivity(us/cm)	PH值	温度		序号	电导率us/cm	PH值
60	2.44	0.448	2.21	0.57	2.51	0.38	60	2.23	0.398	1.98	0.616	2.14	0.684	2.52	2.32	0.2	2.02	2.216	-0.196		x1	330	8.56			x22	793	8.28
80	3.12	0.232	2.91	0.13	2.72	0.17	80	2.69	0.062	3.25	0.654	3.16	0.336			0	1.84	2.216	-0.376		x2	265	8.72			x23	442	8.73
100	3.18	0.292	3.25	0.47	2.84	0.05	100	3.14	0.512	3.44	0.844	3.82	0.996	2.98	2.244	0.736	1.88	2.216	-0.336		x3					x24	321	8.89
	2.888		2.78		2.89			2.628		2.596		2.824		2.46	2.244	0.216	2.36	2.216	0.144		x4	220	8.94			x25	255	8.96
Bolling							Maturity							2.12	2.244	-0.124	2.98	2.216	0.764		x5	224	9.01			x26	250	9.06
135DAS	ECe（ds/m）						180DAS	ECe（ds/m）						1.84	2.244	-0.404			0		x6	319	8.98			x27	314	9.05
Soil depth	T1		T2		T3		Soil depth	T1		T2		T3		1.82	2.244	-0.424	3.24	2.846	0.394		x7	474	8.8			x28	348	8.98
20	2.48	0.06	1.65	0.354	2.02	0.196	20	3.24	0.394	2.84	0.456	3.62	0.876			0	3.13	2.846	0.284		x8	424	8.78			x29	741	8.5
40	2.31	0.11	1.2	0.804	1.84	0.376	40	3.13	0.284	2.29	0.094	2.89	0.146	3.24	2.812	0.428	3.21	2.846	0.364		x9	483	8.76			x30	905	8.32
60	2.25	0.17	1.24	0.764	1.88	0.336	60	3.21	0.364	2.03	0.354	2.62	0.124	3.12	2.812	0.308	2.51	2.846	-0.336		x10	442	8.96			x31	1031	8.22
80	2.33	0.09	2.19	0.186	2.36	0.144	80	2.51	0.336	2.35	0.034	2.22	0.524	2.84	2.812	0.028	2.14	2.846	-0.706		x11	503	8.92			x32	1196	8.3
100	2.73	0.31	3.74	1.736	2.98	0.764	100	2.14	0.706	2.41	0.026	2.37	0.374	2.17	2.812	-0.642			0		x12	508	8.89			x33	1008	8.32
	2.42		2.004		2.216			2.846		2.384		2.744		2.69	2.812	-0.122	2.84	2.384	0.456		x13	704	8.28			x34	1275	8.2
																0	2.29	2.384	-0.094		x14	890	8.13			x35	887	8.37
2018 Squaring							Flowering							2.21	2.114	0.096	2.03	2.384	-0.354		x15	800	8.12			x36	922	8.31
45DAS	ECe（ds/m）						90DAS	ECe（ds/m）						2.13	2.114	0.016	2.35	2.384	-0.034		x16	959	7.99			x37	721	8.54
Soil depth	T1		T2		T3		Soil depth	T1		T2		T3		1.85	2.114	-0.264	2.41	2.384	0.026		x17	1092	7.93			x38	654	8.59
20	2.75	0.43	2.98	0.736	3.24	0.428	20	2.21	0.096	1.16	0.5	2.15	0.066	2.12	2.114	0.006			0		x18	489	8.76			x39	660	8.56
40	2.63	0.31	2.46	0.216	3.12	0.308	40	2.13	0.016	1.14	0.52	2.09	0.006	2.26	2.114	0.146	3.62	2.744	0.876		x19	771	8.39			x40	746	8.47
60	1.86	0.46	2.12	0.124	2.84	0.028	60	1.85	0.264	1.25	0.41	1.78	0.304			0	2.89	2.744	0.146		x20	687	8.4			x41	695	8.44
80	1.84	0.48	1.84	0.404	2.17	0.642	80	2.12	0.006	1.89	0.23	2.28	0.196	1.16	1.66	-0.5	2.62	2.744	-0.124		x21	696	8.39			x42	609	8.4
100	2.52	0.2	1.82	0.424	2.69	0.122	100	2.26	0.146	2.86	1.2	2.12	0.036	1.14	1.66	-0.52	2.22	2.744	-0.524
	2.32		2.244		2.812			2.114		1.66		2.084		1.25	1.66	-0.41	2.37	2.744	-0.374
Bolling							Maturity							1.89	1.66	0.23
135DAS	ECe（ds/m）						180DAS	ECe（ds/m）						2.86	1.66	1.2
Soil depth	T1		T2		T3		Soil depth	T1		T2		T3				0
20	2.29	0.124	1.61	0.184	2.26	0.278	20	2.87	0.302	2.44	0.222	2.69	0.224	2.15	2.084	0.066
40	2.14	0.274	1.42	0.374	2.08	0.458	40	2.72	0.152	2.11	0.108	2.56	0.094	2.09	2.084	0.006
60	1.88	0.534	1.28	0.514	1.71	0.828	60	2.34	0.228	1.98	0.238	2.24	0.226	1.78	2.084	-0.304			Number	Electrical conductivity(us/cm)	pH value	Temperature		序号	电导率us/cm	PH值	温度		序号	电导率us/cm	PH值	温度
80	2.74	0.326	2.02	0.226	3.12	0.582	80	2.23	0.338	2.44	0.222	2.51	0.044	2.28	2.084	0.196			x43	925	8.14			x64	223	9.09	21.1		x85	730	8.32	20.8
100	3.02	0.606	2.64	0.946	3.52	0.982	100	2.68	0.112	2.12	0.098	2.33	0.136	2.12	2.084	0.036			x44	740	8.23			x65	644	8.41	20.9		x86	734	8.31	21
	2.414		1.794		2.538			2.568		2.218		2.466				0			x45	691	8.21			x66	1870	8.09	21		x87	630	8.3	21.3
														2.29	2.414	-0.124			x46	556	8.45			x67	763	8.28	20.5		x88	222	8.82	21.1
														2.14	2.414	-0.274			x47	556	8.49	21		x68	624	8.32	20.8		x89	233	8.82	20.7
														1.88	2.414	-0.534			x48	462	8.68	21.4		x69	546	8.41	20.9		x90	291	8.76	21.2
														2.74	2.414	0.326			x49	446	8.77	21.4		x70	503	8.36	20		x91	412	8.63	21.1
														3.02	2.414	0.606			x50	494	8.77	21.2		x71	324	8.62	21.1		x92	427	8.62	21.1
																0			x51	469	8.84	21.2		x72	429	8.65	20.8		x93	463	8.54	20.9
														1.61	1.794	-0.184			x52	556	849	20		x73	329	8.8	21.1		x94	416	8.74	21.2
														1.42	1.794	-0.374			x53	645	8.46	20.9		x74	281	8.92	21		x95	424	8.75	21.1
														1.28	1.794	-0.514			x54	2.10ms/cm	8.33	21.1		x75	272	9	21.1		x96	393	8.85	21
														2.02	1.794	0.226			x55	580	864	21.2		x76	309	9.03	21		x97	380	8.83	20.9
														2.64	1.794	0.846			x56	811	8.29	21.3		x77	376	892	21.1		x98	439	8.75	21.3
																0			x57	700	8.36	21.3		x78	407	8.91	21.2		x99	454	8.8	21.4
														2.26	2.538	-0.278			x58	602	8.37	20.3		x79	456	8.84	21.2		x100	520	8.56	20.8
														2.08	2.538	-0.458			x59	654	8.45	21.1		x80	488	8.83	21.3		x101	499	8.69	21.7
														1.71	2.538	-0.828			x60	690	8.38	20.5		x81	1131	7.76	21.2		x102	701	8.33	20.6
														3.12	2.538	0.582			x61	642	8.43	21		x82	546	8.43	21.1		x103	739	8.29	20.4
														3.52	2.538	0.982			x62	723	8.39	20.9		x83	683	8.3	21		x104	857	8.2	20.7
																0			x63	334	8.97	21.1		x84	230	8.98	21.2		x105	855	8.12	21
														2.87	2.568	0.302
														2.72	2.568	0.152
														2.34	2.568	-0.228
														2.23	2.568	-0.338
														2.68	2.568	0.112
																0
														2.44	2.218	0.222
														2.11	2.218	-0.108
														1.98	2.218	-0.238
														2.44	2.218	0.222
														2.12	2.218	-0.098
																0
														2.69	2.466	0.224
														2.56	2.466	0.094
														2.24	2.466	-0.226
														2.51	2.466	0.044
														2.33	2.466	-0.136

## Sheet: Agronomic and quality of cotton
		Cotton growth characteristics				Cotton quality
		Plant height（cm）	Plant stem (mm）	Leaf area index	Dry matter	Upper half mean length (m)	Length uniformity index (%)	Micro-naire	Breaking strength (Cn/ tex)	Elongation (%)	Lint（%）
	T1	61.15b	10.5ab	2.1b	65.76ab	27.98b	84.2b	4.75b	26.5b	6.9a	36.4c
2017	T2	71.75a	11.41a	3.8a	71.55a	33.1a	87.73a	5.16a	31.6a	7.1a	41.8a
	T3	49.85c	9.4c	2.3b	61.37c	28.43b	83.5b	4.79b	27.2b	7a	38.8b
	T1	64.13b	11.5a	2.4b	66.74ab	28.4b	84.3c	4.76b	25.3b	6.8a	37.4c
2018	T2	75.86a	11.81a	4.1a	72.67a	32.2a	88.3ab	5.06a	30.8 a	7a	41.5a
	T3	53.63c	9.64b	2.6b	54.43c	28.5b	82.7c	4.99ab	26.4b	6.9a	40.3ab
						1

## Sheet: Cotton yield
		Cotton yield	WUEI	water consumption (mm)	WUEET（kg ha-1 mm-1)
	T1	6316ab	1.47ab	686.2	9.2				Irrigation quota
2017	T2	6701a	1.56a	621.1	10.8				430mm
	T3	6037c	1.4c	684.5	8.8
	T1	6227b	1.45b	688.3	9.1
2018	T2	6730a	1.57a	610.4	11
	T3	5991c	1.39b	668.5	8.96
